# Supplementary material
Source: PubMed Central journal article supplement (PMC6112184)
Supplement: Supp_Table1.pdf [file Supp_Table1.pdf]

## Supplementary Data

SUPPLEMENTARY TABLE S1. GENERAL PATHOLOGICAL CHARACTERISTICS OF RADIOGENIC AND SPORADIC PTC IN AGE-MATCHED GROUPS

| Characteristics         | Children (4 to ≤14 years at surgery)              |                                      |                      | Adolescents (15 to ≤18 years at surgery) |                                      |                   | Adults (≥19 to 28 years at surgery)  |                                      |                   |
|-------------------------|---------------------------------------------------|--------------------------------------|----------------------|------------------------------------------|--------------------------------------|-------------------|--------------------------------------|--------------------------------------|-------------------|
|                         | Rad (n=121)<br>n (%) or<br>mean (SD) <sup>a</sup> | Spor (n=60)<br>n (%) or<br>mean (SD) | OR <sup>b</sup> [CI] | Rad (n=66)<br>n (%) or<br>mean (SD)      | Spor (n=54)<br>n (%) or<br>mean (SD) | OR [CI]           | Rad (n=114)<br>n (%) or<br>mean (SD) | Spor (n=80)<br>n (%) or<br>mean (SD) | OR [CI]           |
| <b>Capsule</b>          | 6 (5.0)                                           | 14 (23.3)                            | 0.20 [0.07–0.56]     | 10 (15.2)                                | 9 (16.7)                             | 0.82 [0.30–2.23]  | 34 (29.8)                            | 27 (33.7)                            | 0.87 [0.47–1.63]  |
| <b>Size (mean, mm)</b>  |                                                   |                                      |                      |                                          |                                      |                   |                                      |                                      |                   |
| All cases               | 24.0 (14.7)                                       | 21.1 (11.7)                          |                      | 19.1 (12.0)                              | 17.6 (10.5)                          |                   | 18.6 (11.8)                          | 18.4 (13.1)                          |                   |
| Non-encapsulated        | 24.4 (14.8)                                       | 20.5 (11.5)                          | 1.000 <sup>d</sup>   | 18.6 (11.0)                              | 16.1 (9.0)                           | 1.000             | 16.8 (11.1)                          | 12.8 (8.3)                           | 1.000             |
| Fully encapsulated      | 17.7 (10.4)                                       | 23.3 (12.4)                          | 1.000                | 22.1 (16.6)                              | 24.9 (14.6)                          | 1.000             | 23.0 (12.5)                          | 29.4 (13.9)                          | 1.000             |
| <b>Size ≤10 mm</b>      |                                                   |                                      |                      |                                          |                                      |                   |                                      |                                      |                   |
| All cases               | 7 (5.8)                                           | 12 (20.0)                            | 0.29 [0.10–0.82]     | 14 (21.2)                                | 15 (28.7)                            | 0.70 [0.30–1.62]  | 36 (31.6)                            | 32 (40.0)                            | 0.59 [0.32–1.10]  |
| Non-encapsulated        | 6 (5.2)                                           | 9 (19.6)                             | 0.25 [0.08–0.81]     | 12 (21.4)                                | 14 (31.1)                            | 0.59 [0.24–1.47]  | 29 (36.2)                            | 28 (52.8)                            | 0.40 [0.19–0.86]  |
| Fully encapsulated      | 1 (16.7)                                          | 3 (21.4)                             | 0.80 [0.06–10.59]    | 2 (20.0)                                 | 1 (11.1)                             | 0.64 [0.03–14.89] | 7 (20.6)                             | 4 (14.8)                             | 1.66 [0.40–6.96]  |
| <b>Size &gt; 10 mm</b>  |                                                   |                                      |                      |                                          |                                      |                   |                                      |                                      |                   |
| All cases               | 114 (94.2)                                        | 48 (80.0)                            |                      | 52 (78.8)                                | 39 (73.2)                            |                   | 78 (68.4)                            | 48 (60.0)                            |                   |
| Non-encapsulated        | 109 (94.8)                                        | 37 (80.4)                            |                      | 44 (78.6)                                | 31 (68.9)                            |                   | 51 (63.8)                            | 25 (47.2)                            |                   |
| Fully encapsulated      | 5 (83.3)                                          | 11 (78.6)                            |                      | 8 (80.0)                                 | 8 (88.9)                             |                   | 27 (79.4)                            | 23 (85.2)                            |                   |
| <b>Dominant pattern</b> |                                                   |                                      |                      |                                          |                                      |                   |                                      |                                      |                   |
| <b>Papillary</b>        |                                                   |                                      |                      |                                          |                                      |                   |                                      |                                      |                   |
| All cases               | 16 (13.2)                                         | 30 (50.0)                            | 0.16 [0.08–0.35]     | 16 (24.2)                                | 29 (53.7)                            | 0.26 [0.12–0.58]  | 37 (32.5)                            | 39 (48.7)                            | 0.51 [0.28–0.93]  |
| Non-encapsulated        | 15 (13.0)                                         | 28 (60.9)                            | 0.10 [0.04–0.24]     | 13 (23.2)                                | 26 (57.8)                            | 0.21 [0.09–0.51]  | 29 (36.2)                            | 30 (56.6)                            | 0.48 [0.23–0.99]  |
| Fully encapsulated      | 1 (16.7)                                          | 2 (14.3)                             | 1.23 [0.09–17.20]    | 3 (30.0)                                 | 3 (33.3)                             | 0.56 [0.06–5.11]  | 8 (23.5)                             | 9 (33.3)                             | 0.60 [0.19–1.91]  |
| <b>Follicular</b>       |                                                   |                                      |                      |                                          |                                      |                   |                                      |                                      |                   |
| All cases               | 34 (28.1)                                         | 14 (23.3)                            | 1.26 [0.59–2.70]     | 25 (37.9)                                | 12 (22.2)                            | 2.23 [0.97–5.10]  | 46 (40.4)                            | 27 (33.7)                            | 1.31 [0.71–2.42]  |
| Non-encapsulated        | 30 (26.1)                                         | 6 (13.0)                             | 2.29 [0.84–6.20]     | 20 (35.7)                                | 7 (15.6)                             | 3.14 [1.16–8.48]  | 34 (42.5)                            | 13 (24.5)                            | 2.08 [0.94–4.61]  |
| Fully encapsulated      | 4 (66.7)                                          | 8 (57.1)                             | 1.50 [0.19–11.77]    | 5 (50.0)                                 | 5 (55.6)                             | 1.18 [0.16–8.89]  | 12 (35.3)                            | 14 (51.9)                            | 0.51 [0.18–1.47]  |
| <b>Solid-trabecular</b> |                                                   |                                      |                      |                                          |                                      |                   |                                      |                                      |                   |
| All cases               | 71 (58.7)                                         | 16 (26.7)                            | 3.90 [1.92–7.93]     | 25 (37.9)                                | 13 (24.1)                            | 1.92 [0.86–4.29]  | 31 (27.2)                            | 14 (17.5)                            | 1.77 [0.86–3.64]  |
| Non-encapsulated        | 70 (60.9)                                         | 12 (26.1)                            | 4.53 [2.04–10.04]    | 23 (41.1)                                | 12 (26.7)                            | 1.91 [0.81–4.48]  | 17 (21.3)                            | 10 (18.9)                            | 1.16 [0.47–2.87]  |
| Fully encapsulated      | 1 (16.7)                                          | 4 (28.6)                             | 0.50 [0.04–6.00]     | 2 (20.0)                                 | 1 (11.1)                             | 1.82 (0.12–28.52) | 14 (41.2)                            | 4 (14.8)                             | 3.99 [1.11–14.32] |

<sup>a</sup>% for count data, SD for tumor size.

<sup>b</sup>Sporadic PTC group was used as the reference.

<sup>c</sup>Adjusted for age and sex.

<sup>d</sup>One-way nonparametric analysis of variance with Dunn's post-test.
