# Supplementary material
Source: PubMed Central journal article supplement (PMC6112184)
Supplement: Supp_Table4.pdf [file Supp_Table4.pdf]

SUPPLEMENTARY TABLE S4. AGE-RELATED TRENDS  
FOR DIFFERENT CHARACTERISTICS OF RADIOGENIC  
AND SPORADIC FULLY ENCAPSULATED PTC

| <i>Characteristics</i>        | <i>Radiogenic</i>        | <i>Sporadic</i>          | <i>P<sub>het</sub></i> |
|-------------------------------|--------------------------|--------------------------|------------------------|
|                               | <i>P<sub>trend</sub></i> | <i>P<sub>trend</sub></i> |                        |
| <i>Histopathology</i>         |                          |                          |                        |
| Size (mean, mm)               | 0.260                    | 0.113                    | 0.299                  |
| Size ≤10 mm                   | 0.839                    | 0.631                    | 0.574                  |
| <i>Dominant pattern</i>       |                          |                          |                        |
| Papillary                     | 0.894                    | 0.222                    | 0.507                  |
| Follicular                    | 0.122                    | 0.739                    | 0.318                  |
| Solid-trabecular              | 0.014↑                   | 0.321                    | 0.068                  |
| Oxyphilic changes             | 0.010↑                   | 0.180                    | 0.105                  |
| Concomitant nodular pathology | 0.927                    | 0.356                    | 0.496                  |
| Concomitant diffuse pathology | 0.774                    | 0.779                    | 0.782                  |
| Chronic thyroiditis           | 0.813                    | 0.690                    | 0.813                  |
| <i>Tumor invasiveness</i>     |                          |                          |                        |
| Tumor capsule invasion        | 0.224                    | 0.520                    |                        |
| Intrathyroid spread (focal)   | 0.515                    | 0.888                    | 0.105                  |
| Extrathyroidal extension (T3) | 0.337                    | ND                       | ND                     |
| Multifocality (Tm)            | 0.100                    | 0.356                    | ND                     |
| Lymphatic/vascular invasion   | 0.001↓                   | 0.376                    | 0.070                  |
| Lymph node metastases (N1)    | 0.036↓                   | ND                       | ND                     |
| Distant metastases (M1)       | ND                       | ND                       | ND                     |

ND, not determined.
