# Supplementary material
Source: PubMed Central journal article supplement (PMC6112184)
Supplement: Supp_Table5.pdf [file Supp_Table5.pdf]

SUPPLEMENTARY TABLE S5. OR PER Gy AND CI FOR  
VARIOUS HISTOPATHOLOGIC AND INVASIVE PTC  
CHARACTERISTICS IN RADIOGENIC CASES

| <i>Characteristics</i>               | <i>OR per Gy</i> | <i>CI</i> | <i>p<sub>1</sub><sup>a</sup></i> | <i>p<sub>2</sub><sup>b</sup></i> |
|--------------------------------------|------------------|-----------|----------------------------------|----------------------------------|
| Tumor size ≤10 mm vs. >10 mm         | 1.20             | 1.06–1.39 | 0.004                            | NA                               |
| Dominant growth pattern <sup>c</sup> | 1.18             | 0.98–1.63 | 0.103                            | 0.081                            |
| Oxyphilic changes                    | 1.09             | 0.88–1.26 | 0.341                            | 0.423                            |
| Concomitant nodular pathology        | 1.24             | 1.08–1.45 | 0.003                            | 0.052                            |
| Concomitant diffuse pathology        | 0.83             | 0.56–1.04 | 0.127                            | 0.153                            |
| Intrathyroid spread                  | 0.93             | 0.81–1.05 | 0.237                            | 0.440                            |
| Extrathyroidal extension             | 0.87             | 0.74–0.99 | 0.031                            | 0.106                            |
| Multifocality                        | 1.04             | 0.87–1.18 | 0.581                            | 0.773                            |
| Lymphatic/vascular invasion          | 0.87             | 0.76–0.98 | 0.220                            | 0.083                            |
| Lymph node metastasis                | 0.93             | 0.83–1.04 | 0.197                            | 0.553                            |
| Distant metastases                   | 0.93             | 0.70–1.08 | 0.385                            | 0.612                            |

<sup>a</sup>Adjusted for age and sex.

<sup>b</sup>Additionally adjusted for tumor size.

<sup>c</sup>Follicular and solid-trabecular vs. papillary.

NA, not available.
